## **Times to Key Events in the Course of Zika Infection and their Implications for Surveillance: A Systematic Review and Pooled Analysis**

**Justin Lessler (corresponding)**, Department of Epidemiology, Johns Hopkins Bloomberg School of Public Health, 615 N Wolfe St., Baltimore MD, USA. 21205. [justin@jhu.edu](mailto:justin@jhu.edu)

Cassandra T. Ott\*, Department of Epidemiology, Johns Hopkins Bloomberg School of Public Health, Baltimore, MD, USA

Andrea C. Carcelen\*, Department of International Health, Johns Hopkins Bloomberg School of Public Health, Baltimore, MD, USA

Jacob M. Konikoff\*, Department of Biostatistics, Johns Hopkins Bloomberg School of Public Health, Baltimore, MD, USA

Joe Williamson, Department of Environmental Health Sciences, Johns Hopkins Bloomberg School of Public Health, Baltimore, MD, USA

Qifang Bi, Department of Epidemiology, Johns Hopkins Bloomberg School of Public Health, Baltimore, MD, USA

Nicholas G. Reich, Division of Biostatistics and Epidemiology, School of Public Health and Health Sciences, University of Massachusetts Amherst, Amherst, MA, USA

Derek A. T. Cummings, Department of Biology, Emerging Pathogens Institute, University of Florida

Lauren M. Kucirka, Department of Surgery, Johns Hopkins University School of Medicine and Department of Epidemiology, Johns Hopkins Bloomberg School of Public Health, Baltimore, MD, USA

Lelia H. Chaisson, Department of Epidemiology, Johns Hopkins Bloomberg School of Public Health, Baltimore, MD, USA

\* - denotes equal contribution

**Words:** 2,619 text, 250 abstract.

## ABSTRACT

### *Background*

Evidence suggests that Zika virus has driven a 10-fold increase in babies born with microcephaly in Brazil, prompting the WHO to declare a Public Health Emergency of International Concern. However, little is known about the natural history of infection. These data are critical for implementing surveillance and control measures such as protecting the blood supply.

### *Methods*

We conducted a systematic review and pooled analysis to estimate the distribution of times from Zika infection to symptom onset, seroconversion, and viral clearance, and analyzed their implications for surveillance and blood supply safety.

### *Results*

Based on 25 cases, we estimate the median incubation period of Zika virus infection is 5.9 days (95% CI: 4.4-7.6), and that 95% of those who do develop symptoms will do so by 11.1 days post-infection (95% CI: 7.6-18.0). On average seroconversion occurs 9.0 days (95% CI, 7.0-11.6) after infection, and virus is detectable in blood for 9.9 days (95% CI: 6.8-21.4). In 5% of cases detectable virus persists for over 18.9 days (95% CI: 12.6-79.5). The baseline (no screening) risk of a Zika infected blood donation increases by approximately 1 in 10,000 for every 1 per 100,000 person-days increase in Zika incidence. Symptom based screening reduces this by 7% (RR 0.93, 95% CI 0.86-0.99), and antibody screening by 29% (RR 0.71, 95% CI: 0.28-0.88).

### *Conclusions*

Symptom or antibody-based surveillance can do little to reduce the risk of Zika contaminated blood donations. High incidence areas may consider PCR testing to identify lots safe for use in pregnant women.

## 1 INTRODUCTION

2 The explosion of Zika cases in Central and South America, combined with growing evidence that the  
3 virus is responsible for an epidemic of microcephaly in Brazil, has prompted the World Health  
4 Organization (WHO) to declare a Public Health Emergency of International Concern.<sup>1</sup> As of February 29,  
5 2016, there have been at least a half-million Zika virus infections in the Americas.<sup>2,3</sup> Although clinical  
6 disease is generally mild or asymptomatic,<sup>4</sup> there is increasing evidence of a link between Zika virus  
7 infection and severe microcephaly in infants born to women infected during pregnancy, including a 10-  
8 fold increase in microcephaly cases in Brazil in the wake of the 2015 Zika epidemic<sup>5</sup>. Zika virus infection  
9 has been linked to Guillain-Barre in adults.<sup>5,6</sup>

10

11 The severity of these complications highlights the need to protect pregnant women from  
12 infection and to ensure that blood supplies remain safe both in areas experiencing ongoing Zika virus  
13 transmission and in locations with travelers returning from affected areas. That large proportion of Zika  
14 infections that remain asymptomatic,<sup>4</sup> inadequacy of current diagnostics, and uncertainties regarding  
15 the duration of viremia and viral shedding have raised concerns about the potential threat of  
16 transmission through blood transfusion. In a 2013-2014 outbreak in French Polynesia, researchers found  
17 that 3% of asymptomatic blood donors were infected with Zika virus,<sup>7</sup> and several cases of possible Zika  
18 transmission through blood transfusion are currently being investigated in Brazil.<sup>8</sup> As a result, some  
19 agencies now recommend halting blood donations in areas with active Zika transmission.<sup>9,10</sup> If  
20 implemented, these bans could result in severe blood supply shortages. Research to determine the  
21 duration of viremia and time to antibody seroconversion is therefore vital to quantify the risk to blood  
22 supplies, and develop efficient strategies for protection. Furthermore, more detailed estimates of key  
23 distributions in the natural history of Zika virus infection, including the incubation period and probable

24 infectious period, are essential to designing evidence based surveillance systems and informing public  
25 health policy.<sup>11,12</sup>

26

27 In order to better characterize the natural history of Zika infection and inform disease  
28 prevention, surveillance, and blood supply safety, we performed a systematic literature review and  
29 pooled analysis of available data to estimate the incubation period, time to seroconversion, and length  
30 of shedding of Zika virus in infected populations.

31

32

### 33 **METHODS**

34 The systematic review was conducted according to the Meta-analysis of Observational Studies in  
35 Epidemiology (MOOSE) guidelines<sup>13</sup> and the Preferred Reporting Items for Systematic Review and Meta-  
36 Analyses (PRISMA) guidelines<sup>14</sup> where applicable (see Supplemental Material).

37

#### 38 *Search strategy and selection criteria*

39 We searched PubMed, Scopus, and Web of Science on February 8, 2016 for all publications containing  
40 the word "Zika" in any field, with no restriction on date of publication or language. The search was  
41 updated on February 25, 2016 to identify additional relevant publications.

42

43 We included publications that provided information on time of exposure to Zika virus and 1)  
44 time of symptom onset, 2) time of sample collection for virologic Zika virus testing (e.g. PCR or culture)  
45 and test results (positive/negative), and/or 3) time of collection of samples for antibody testing and test  
46 results (positive/negative). We excluded publications if they did not provide sufficient information to

47 determine a bounded time of exposure to Zika virus, contained no data from humans, were not in  
48 English or French, or reported only perinatal transmission of Zika virus.

49

50 Two reviewers (CTO, LHC, JW, AC) independently screened titles and abstracts for relevance. We  
51 excluded publications from full text review if they were not about Zika virus or if they definitively met  
52 one of the exclusion criteria. Two reviewers (CTO, LHC, JW, AC) independently performed full text  
53 reviews to identify publications with sufficient data for analysis; we contacted authors via email to  
54 obtain additional information for publications that were relevant but did not provide sufficient data for  
55 analysis. Discrepancies were resolved by discussion and consensus.

56

#### 57 *Data abstraction*

58 Two reviewers (CTO, LC, JW, AC) independently abstracted data using a standardized form and resolved  
59 discrepancies by discussion and consensus. We abstracted data necessary to estimate: 1) the incubation  
60 period of Zika virus, 2) the time and duration of viral shedding, and 3) the time to antibody  
61 seropositivity. We reviewed text, tables, and figures for information that allowed us to bound the time  
62 of: 1) exposure to Zika virus, 2) symptom onset, 3) collection of samples for Zika virus testing, and 4)  
63 collection of samples for antibody testing. For all virologic and serologic samples, the reported test  
64 result was recorded, and IgM specific serologies were noted when available. When possible, the exact  
65 timing of events was used, otherwise timing of the event was bounded based upon available  
66 information (e.g., travel dates to Zika endemic regions). We further recorded basic demographic  
67 characteristics, the type of sample collected (e.g., blood, urine), and, when available, the mode of  
68 transmission.

69

70           Extracted data was used to construct a data set bounding the time of key events. The time of  
71 Zika infection was bounded by the earliest and latest potential time of Zika virus exposure consistent  
72 with the case report. When no latest time of exposure could be determined (e.g., the case developed  
73 symptoms while in a Zika endemic area) the latest possible time of symptom onset was considered to be  
74 the latest possible time of exposure, the most conservative assumption we could make. Time of  
75 symptom onset was bounded based on the case report, and in most cases was specified to the nearest  
76 day. The earliest possible time of seroconversion was considered to be immediately after the last  
77 negative serological test, and the latest possible time of seroconversion was immediately before the first  
78 positive serological test. If there was only a positive serological test, the earliest possible time of  
79 seroconversion was considered to be the same as the earliest possible time of exposure; when only  
80 negative tests were performed, time to seroconversion was considered to be right censored. Similarly,  
81 the earliest possible time of viral clearance was the time of the last positive test (by PCR or viral culture),  
82 and the latest was the time of the first subsequent negative test. Missing virologic tests were treated  
83 the same as in the serological data.

84

#### 85 *Statistical Methods - Pooled Analysis*

86 Bounding periods were used to construct doubly interval censored data sets for each distribution,<sup>15</sup> and  
87 distributions were fit using an adaptation of techniques previously described.<sup>15,16</sup> Briefly, MCMC  
88 techniques were used to simultaneously fit the incubation period distribution (log-normal), distribution  
89 of time to IgM seroconversion (Weibull), and time to viral clearance (Weibull) to the doubly interval  
90 censored data. Given a time of infection the distributions were considered to be independent. The mean  
91 incubation period, and the times by which we expect 5%, 25%, 50%, 75%, and 95% of those who do  
92 develop Zika symptoms to become symptomatic were estimated. Full details are available in the  
93 supplemental appendix.

94

95 *Statistical Methods - Blood Supply Safety*

96 The impact of key distributions on blood supply safety was calculated assuming a constant incidence  
97 rate. The number of possibly infected donors per 100,000 if no screening occurs was calculated as: (daily  
98 incidence rate per 100,000)  $\times$  (mean time to viral clearance). This estimate was adjusted for symptom  
99 based screening based on mean time to symptom onset, assuming that 80% of the population remains  
100 asymptomatic. The effect of serological based screening was calculated based on the mean time to the  
101 first of seroconversion or viral clearance (assuming independence), as the former cases would be  
102 successfully screened, and the latter would no longer be infectious. We assumed that any screening  
103 protocol would treat equivocal IgM ELISA results as being seropositive. Full equations are provided in  
104 the supplement.

105

106 Sensitivity to key model assumptions was assessed (see Supplement for results).

107

108 Analyses were performed using JAGS and the R Statistical Language.<sup>17,18</sup> All data and code is  
109 available on GitHub (<https://github.com/HopkinsIDD/ZikaLitReview>).

110

111

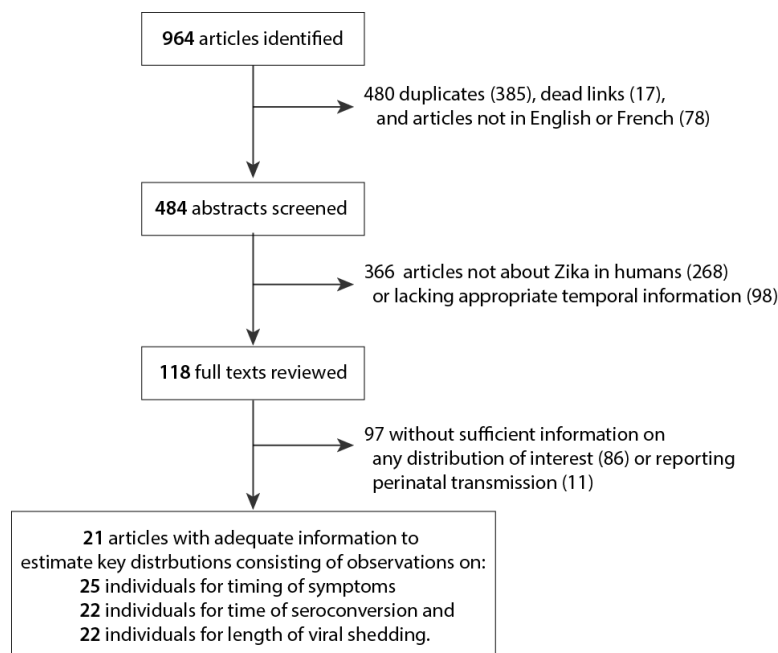

112

113 **Figure 1:** Systematic review process.

114

## 115 **RESULTS**

116 *Systematic Review Results* We identified 964 articles discussing Zika indexed by Pubmed, Scopus and/or

117 Web of Science as of February 25, 2016 (Figure 1). After abstract and title screening, 846 articles were

118 excluded based on predetermined criteria (480 duplicates, dead links, or non-English or French; 366 not

119 about Zika in humans or lacking appropriate data). Among 118 articles selected for full text review and

120 possible data abstraction, 86 did not have sufficient exposure information or dates of onset to estimate

121 key distributions, and 11 reported suspected perinatal transmission. Authors were contacted for 4

122 articles lacking sufficient information on one or more cases; additional information was returned on one

123 case, but we were still unable to bound the time of exposure. We extracted data from 21 articles that

124 provided information on 25 unique Zika cases (Table 1). The analytic data set included: 25 individuals

125 with a bounded time of symptom onset, 49 virologic tests on 22 individuals, and 62 serologic tests on 22

126 individuals.

127



128           Of the cases in the final data set, 23 were infected while traveling in endemic areas, one via  
129 sexual transmission, and one through experimental infection. The vast majority of cases occurred after  
130 2008 and were among residents of the United States or Europe (Table 1). None of the reported  
131 infections were among children, and there were roughly equal numbers of males and females (14/25  
132 male).  
133  
134

**Table 1.** Characteristics of Zika cases included in pooled analysis (N=25)

| First author (year)            | Age       | Sex    | Place of origin | Probable location infected                                             | Year exposed | Exposure window (days) | Days to symptom onset (min-max) | Days to seroconversion (min-max) | Days to viral clearance <sup>a</sup> (min-max) |
|--------------------------------|-----------|--------|-----------------|------------------------------------------------------------------------|--------------|------------------------|---------------------------------|----------------------------------|------------------------------------------------|
| Bearcroft (1956) <sup>19</sup> | 34        | Male   | Europe          | Nigeria <sup>b</sup>                                                   | –            | <1                     | 3-4                             | 4-9                              | >6 <sup>c</sup>                                |
| Chen (2016) <sup>20</sup>      | 55        | Male   | USA             | Costa Rica                                                             | 2015         | 8                      | 3-12                            | <39                              | –                                              |
| Duffy (2009) <sup>4</sup>      | –         | Female | USA             | Yap Island                                                             | 2007         | 13                     | 7-21                            | <34                              | –                                              |
| Fonseca (2014) <sup>21</sup>   | –         | Female | Canada          | Thailand                                                               | 2013         | 16                     | 1-18                            | <24 <sup>d</sup>                 | 26-28                                          |
| Foy (2011) <sup>22</sup>       | 36        | Male   | USA             | Senegal                                                                | 2008         | 24                     | 5-30                            | <33                              | <33 <sup>e</sup>                               |
|                                | 27        | Male   | USA             | Senegal                                                                | 2008         | 24                     | 4-29                            | <33                              | <33 <sup>e</sup>                               |
|                                | –         | Female | USA             | USA <sup>f</sup>                                                       | 2008         | 7                      | 3-11                            | 15-34                            | <16 <sup>e</sup>                               |
| Ginier (2016) <sup>23</sup>    | 51        | Female | Switzerland     | Guatemala, El Salvador                                                 | 2015         | 14                     | 3-18                            | <24                              | >23                                            |
| Gyurech (2016) <sup>24</sup>   | 44        | Female | Switzerland     | Brazil                                                                 | 2015         | 1                      | 4-17                            | 19-23                            | <23                                            |
| Korhonen (2016) <sup>25</sup>  | 37        | Male   | Finland         | Maldives                                                               | 2015         | 183                    | 1-185                           | –                                | <191 <sup>g</sup>                              |
| Kutsuna (2014) <sup>26</sup>   | Early 30s | Female | Japan           | Bora Bora                                                              | 2013-2014    | 10                     | 5-16                            | <21                              | <21 <sup>h</sup>                               |
| Kwong (2013) <sup>27</sup>     | 52        | Female | Australia       | Indonesia                                                              | –            | 9                      | 0-10                            | –                                | 13-24                                          |
| Leung (2015) <sup>28</sup>     | 27        | Male   | Australia       | Indonesia <sup>i</sup>                                                 | –            | 6                      | 2-9                             | –                                | <14 <sup>j</sup>                               |
| Maria (2016) <sup>29</sup>     | 60s       | Female | France          | Martinique Island                                                      | 2015         | 22                     | 1-24                            | <28                              | –                                              |
|                                | 20s       | Male   | France          | Brazil                                                                 | 2015-2016    | 8                      | 0-9                             | <17                              | –                                              |
|                                | 50s       | Male   | France          | Colombia                                                               | 2015-2016    | 29                     | 0-30                            | 31-37                            | – <sup>k</sup>                                 |
| Shinohara (2016) <sup>30</sup> | Early 40s | Male   | Japan           | Thailand                                                               | 2014         | 7                      | 1-9                             | 10-14                            | >10 <sup>d</sup>                               |
| Simpson (1964) <sup>31</sup>   | 28        | Male   | Europe          | Uganda                                                                 | –            | 76                     | 0-77                            | <78                              | >2 <sup>c</sup>                                |
| Summers (2015) <sup>32</sup>   | 48        | Male   | USA             | Ecuador, Peru, Bolivia, Chile, Easter Island, French Polynesia, Hawaii | 2013         | 34                     | 0-35                            | <45                              | –                                              |
| Tappe (2015) <sup>33</sup>     | 45        | Female | Germany         | Malaysia                                                               | 2014         | 22                     | 5-28                            | 29-33                            | <30                                            |
| Tappe (2014) <sup>34</sup>     | Early 50s | Male   | Germany         | Thailand                                                               | 2013         | 12                     | 0-12                            | <22                              | <22                                            |
| Wæhre (2014) <sup>35</sup>     | 31        | Female | Norway          | Tahiti                                                                 | 2013         | 15                     | 0-16                            | 20-52                            | 20-52 <sup>l</sup>                             |
| Zammarchi (2015) <sup>36</sup> | Early 60s | Male   | Italy           | Brazil                                                                 | 2015         | 12                     | 0-13                            | <16                              | <16                                            |
| Zammarchi (2015) <sup>37</sup> | Early 30s | Female | Italy           | French Polynesia                                                       | 2013-2014    | 19                     | 0-20                            | 22-58                            | >22                                            |
|                                | Early 30s | Male   | Italy           | French Polynesia                                                       | 2013-2014    | 19                     | 0-20                            | 22-56                            | <23                                            |

<sup>a</sup> Days to viral clearance in sera

<sup>b</sup> Volunteer inoculation of Zika virus

<sup>c</sup> Viral shedding determined from mouse inoculation

<sup>d</sup> Equivocal result counted as positive

<sup>e</sup> Serum was positive by PCR and negative by culture

<sup>f</sup> Probable sexual transmission

<sup>g</sup> Serum was negative by PCR; urine was positive by PCR at later visit

<sup>h</sup> Serum was negative by PCR; urine was positive by PCR

<sup>i</sup> Possible transmission from monkey bite or mosquito

<sup>j</sup> Serum and swab of monkey bite site were negative by PCR; nasopharyngeal swab was positive by PCR

<sup>k</sup> No sera tested; plasma and urine positive by PCR; plasma was negative by PCR and urine and saliva were positive by PCR at a later visit

<sup>l</sup> Serum was positive by PCR and negative by culture

135

136 *Key Distributions*

137 We estimate the median incubation period of Zika virus to be 5.9 days (95% CI: 4.4-7.6), with a  
138 dispersion of 1.46 (95% CI: 1.23-1.94). Hence, 5% of cases will develop symptoms by 3.2 days after  
139 infection (95% CI: 1.7-4.6), 25% by 4.6 days (95% CI: 3.1, 6.0), 75% by 7.6 days (95% CI: 5.8-10.4), and  
140 95% by 11.2 days (95% CI: 7.6-18.0) (Figure 2A).

141

142 We estimate the mean time to viral clearance, defined as having no detectable virus in the  
143 blood, to be 9.9 days (95% CI: 6.9-21.4). We estimate that 5% of cases will have no detectable virus by  
144 2.4 days after infection (95% CI: 0.09-5.9), 25% by 5.8 days (95% CI: 1.4, 9.2), 75% by 12.7 days (95% CI:  
145 9.2-25.9), and 95% by 18.9 days (95% CI: 13.6-79.4) (Figure 2B).

146

147 We estimate the mean time to seroconversion is 9.1 days (95% CI: 7.0-11.6). ). We estimate that  
148 5% of cases will have detectable antibodies by 4.4 days after infection (95% CI: 1.3-7.0), 25% by 7.1 days  
149 (95% CI: 4.0, 9.2), 75% by 10.1 days (95% CI: 8.7-14.6), and 95% by 13.7 days (95% CI: 10.6-21.7)  
150 (Figure 2C).

151

152

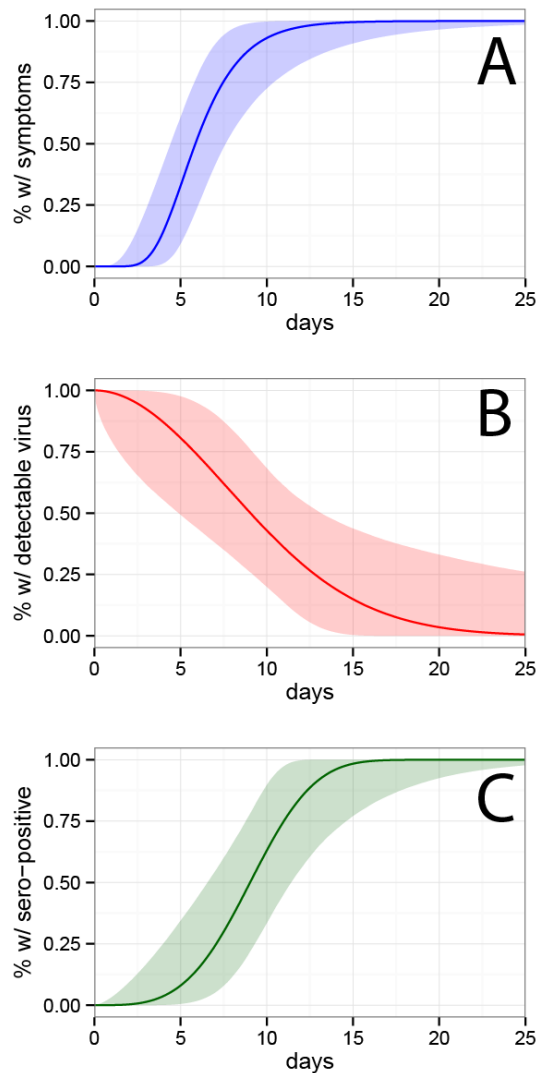

153

154 **Figure 2:** Percentage of the population with **(A)** symptom onset after a given time, **(B)** still shedding at a  
155 given day, and **(C)** testing seropositive as of a given day. Shaded regions indicate 95% credible intervals.

156

### 157 *Implications for Surveillance and Blood Supply Safety*

158 The mean time to viral clearance from the blood is 9.9 days, hence, in settings with ongoing  
159 transmission, if no screening of any type were performed, there would be a 9.9 per 100,000 donors  
160 increase (95% CI: 6.9-21.4) in the risk of a blood donation being infected with Zika for every 1 in 100,000  
161 increase in daily Zika incidence. Preventing those with recent symptoms of possible Zika infection from

162 donating would only decrease this risk by 7% (RR 0.93, 95% CI 0.89-0.99), as 80% of individuals with Zika  
163 infection are asymptomatic, and even those who do develop symptoms will be infectious but  
164 asymptomatic for an average of six days (assuming blood donations can transmit Zika virus from the  
165 moment of infection). Serological screening is more effective, reducing the risk by 29% (RR 0.71, 95% CI:  
166 0.28-0.88), but still only marginally improves blood supply safety.

167

168           Since it may not be practical to stop blood donations until the Zika epidemic has passed,  
169 countries may consider virologic (i.e., nucleic acid) testing of particular lots of donated blood for  
170 targeted use in pregnant women. Still, even nucleic acid testing is imperfect; we did find a single case of  
171 a negative virologic blood test followed by a positive one, though this was in the context of a perinatal  
172 transmission and not part of our main analysis.<sup>38</sup>

173

174           In settings where the risk is solely from imported Zika cases, ensuring blood supply safety is far  
175 easier. By 23.4 (95% CI, 14.3-154.3) days after infection, 99% of infections are expected to no longer  
176 have detectable virus in their blood. While this number cannot be estimated with confidence given the  
177 low number of observations it is based upon, it can serve as the basis for a risk averse donation rule (e.g.  
178 no donation for 300 days after travel to a Zika endemic regions, over twice the upper limit of the  
179 confidence interval for this estimate).

180

181           It is important to note that here we assume that not having detectable virus in blood implies  
182 safe blood donation; however, risk to the blood supply when virus is present in other fluids cannot be  
183 ruled out. We found four cases in which virus was no longer detectable in blood but a saliva, nasal, or  
184 urine sample tested positive (Table 1). While we have inadequate data to estimate the time to viral  
185 clearance in these fluids, we estimate the latest of these positive tests was 12.0 days after infection

186 (95% CI: 10.1-18.2) for the individuals in our dataset. Duration of viremia in other fluids may be relevant  
187 to other public health recommendations (e.g., how long to abstain from sex with a potentially pregnant  
188 partner).

189

## 190 **DISCUSSION**

191 As of time of writing, the WHO reports the incubation period of Zika virus as unclear, but likely  
192 “a few days.”<sup>39</sup> Likewise, the US Centers for Disease Control and Prevention (CDC) states that the  
193 incubation period of Zika is unknown but probably “a few days to a week,”<sup>40</sup> and the European Centre  
194 for Disease Prevention and Control (ECDC) estimates 3-12 days.<sup>41</sup> Our analysis substantially clarifies the  
195 true incubation period for Zika virus infection and the amount of uncertainty that remains. We similarly  
196 illuminate the distribution of time to seroconversion and time to viral clearance.

197

198 Understanding what is known about key distributions in the natural history of Zika virus  
199 infection is an important component of designing and evaluating screening and surveillance protocols,  
200 as we illustrate with an analysis of screening for Zika infection in blood donors. While the risk is quite  
201 low, it scales with Zika incidence, which in turn is hard to measure due to the high number of  
202 asymptomatic cases. Screening is important, but only a direct antigen test can have any hope of  
203 substantially reducing risk, though serologic tests may be able to offer a marginal (~30%) improvement.

204

205 This analysis is based on published data that was collected for reasons other than estimation of  
206 these key distributions; as such we were required to make several assumptions. We assumed that the  
207 virologic testing of blood or sera is 100% sensitive for detecting Zika virus; however there is evidence  
208 that viral shedding can continue far longer in urine and other bodily fluids, raising concerns that virus  
209 may exist in the blood below the limit of detection. We assumed that the distribution of time to

210 seropositivity is independent of previous infection with other flaviviruses (those with prior flavivirus  
211 infections will likely seroconvert more quickly). Since the majority of the cases included in our analysis  
212 were travelers returning to countries with little endemic flavivirus circulation, it is likely our estimates of  
213 time to seroconversion are conservative (i.e., long). Further, the majority of our data comes from  
214 presumed mosquito infections, and these distributions may differ for other routes of infection (e.g.,  
215 perinatal, sexual). Likewise, all of the cases we report were symptomatic, and the distribution of time to  
216 seroconversion and viral clearance may differ in asymptomatic individuals. However, the biggest  
217 limitation of our analysis is the small number of cases, which both increases uncertainty and the  
218 potential for bias.

219

220         Despite the limitations of this analysis, our estimates are the most detailed, quantitative  
221 estimates to date for the natural history of Zika virus. These estimates can be used to target  
222 surveillance in both endemic settings and for returning travelers as well as guide empirical efforts to  
223 study basic features of this pathogen.

224

225

## 226 **ACKNOWLEDGEMENTS**

227         We would like to thank Prof. Alfonso Javier Rodriguez-Morales for providing additional data on  
228 reported cases. We also thank Joshua Sharfstein for helping to bring together the team to perform this  
229 rapid review. We further thank the Department of Epidemiology and the Office of Public Health Practice  
230 and Training at the Johns Hopkins Bloomberg School of Public Health for financially supporting this  
231 work.

232

233

234 **REFERENCES**

- 235 1. WHO Director-General summarizes the outcome of the Emergency Committee  
236 regarding clusters of microcephaly and Guillain-Barré syndrome. WHO statement on the first  
237 meeting of the International Health Regulations (2005) Emergency Committee on Zika virus and  
238 observed increase in neurological disorders and neonatal malformations: World Health  
239 Organizaion; 2016.
- 240 2. Cumulative Zika suspected and confirmed cases reported by countries and territories in  
241 the Americas, 2015-2016. PAHO/WHO, 2016. (Accessed 28 February 2016, at  
242 [http://ais.paho.org/hiph/viz/ed\\_zika\\_cases.asp](http://ais.paho.org/hiph/viz/ed_zika_cases.asp).)
- 243 3. Protocol for surveillance and response to the occurrence of microcephaly Ministério da  
244 Saúde. Secretaria de Vigilância em Saúde. Departamento de Vigilância das Doenças  
245 Transmissíveis.; 22 January 2016.
- 246 4. Duffy MR, Chen TH, Hancock WT, et al. Zika virus outbreak on Yap Island, Federated  
247 States of Micronesia. N Engl J Med 2009;360:2536-43.
- 248 5. Organizaion WH. Zika virus microcephaly and guillain-barré syndrome. Situation Report:  
249 World Health Organization; 26 February 2016.
- 250 6. Cao-Lormeau V-M, Blake A, Mons S, et al. Guillain-Barre Syndrome outbreak  
251 associated with Zika virus infection in French Polynesia: a case-control study. The Lancet.
- 252 7. Musso D, Nhan T, Robin E, et al. Potential for Zika virus transmission through blood  
253 transfusion demonstrated during an outbreak in French Polynesia, November 2013 to February  
254 2014. Euro Surveill 2014;19.
- 255 8. Brazil reports Zika infection from blood transfusions. Reuters. (Accessed 28 February  
256 2016, at <http://www.reuters.com/article/us-health-zika-brazil-blood-idUSKCN0VD22N>.)



- 257 9. Red Cross Statement on the Zika Virus. American Red Cross. (Accessed 28 February  
258 2016, at [http://www.redcross.org/news/press-release/Red-Cross-to-Implement-Blood-Donor-  
259 Self-Deferral-Over-Zika-Concerns.](http://www.redcross.org/news/press-release/Red-Cross-to-Implement-Blood-Donor-Self-Deferral-Over-Zika-Concerns))
- 260 10. New blood donation rules protect Canadian blood supply from Zika virus. Canadian  
261 Blood Services. (Accessed 28 February 2016, at [https://www.blood.ca/en/media/new-blood-  
262 donation-rules-protect-canadian-blood-supply-from-zika-virus.](https://www.blood.ca/en/media/new-blood-donation-rules-protect-canadian-blood-supply-from-zika-virus))
- 263 11. Fraser C, Riley S, Anderson RM, Ferguson NM. Factors that make an infectious disease  
264 outbreak controllable. *Proc Natl Acad Sci U S A* 2004;101:6146-51.
- 265 12. Lessler J, Brookmeyer R, Reich NG, Nelson KE, Cummings DA, Perl TM. Identifying the  
266 probable timing and setting of respiratory virus infections. *Infect Control Hosp Epidemiol*  
267 2010;31:809-15.
- 268 13. Stroup DF, Berlin JA, Morton SC, et al. Meta-analysis of observational studies in  
269 epidemiology: a proposal for reporting. Meta-analysis Of Observational Studies in Epidemiology  
270 (MOOSE) group. *Jama* 2000;283:2008-12.
- 271 14. Moher D, Liberati A, Tetzlaff J, Altman DG. Preferred reporting items for systematic  
272 reviews and meta-analyses: the PRISMA statement. *PLoS Med* 2009;6:e1000097.
- 273 15. Reich NG, Lessler J, Cummings DA, Brookmeyer R. Estimating incubation period  
274 distributions with coarse data. *Stat Med* 2009;28:2769-84.
- 275 16. Lessler J, Reich NG, Brookmeyer R, Perl TM, Nelson KE, Cummings DA. Incubation  
276 periods of acute respiratory viral infections: a systematic review. *Lancet Infect Dis* 2009;9:291-  
277 300.
- 278 17. Plummer M. JAGS: A program for analysis of Bayesian graphical models using Gibbs  
279 sampling. 2003.

- 280 18. R: A Language and Environment for Statistical Computing. R Foundation for Statistical  
281 Computing; 2016.
- 282 19. Bearcroft WG. Zika virus infection experimentally induced in a human volunteer. *Trans R*  
283 *Soc Trop Med Hyg* 1956;50:442-8.
- 284 20. Chen LH. Zika Virus Infection in a Massachusetts Resident After Travel to Costa Rica: A  
285 Case Report. *Ann Intern Med* 2016.
- 286 21. Fonseca K, Meatherall B, Zarra D, et al. First case of Zika virus infection in a returning  
287 Canadian traveler. *Am J Trop Med Hyg* 2014;91:1035-8.
- 288 22. Foy BD, Kobylinski KC, Chilson Foy JL, et al. Probable non-vector-borne transmission of  
289 Zika virus, Colorado, USA. *Emerg Infect Dis* 2011;17:880-2.
- 290 23. Ginier M, Neumayr A, Gunther S, Schmidt-Chanasit J, Blum J. Zika without symptoms in  
291 returning travellers: What are the implications? *Travel Med Infect Dis* 2016;14:16-20.
- 292 24. Gyurech D, Schilling J, Schmidt-Chanasit J, Cassinotti P, Kaeppli F, Dobec M. False  
293 positive dengue NS1 antigen test in a traveller with an acute Zika virus infection imported into  
294 Switzerland. *Swiss Med Wkly* 2016;146:w14296.
- 295 25. Korhonen EM, Huhtamo E, Smura T, Kallio-Kokko H, Raassina M, Vapalahti O. Zika  
296 virus infection in a traveller returning from the Maldives, June 2015. *Euro Surveill* 2016;21.
- 297 26. Kutsuna S, Kato Y, Takasaki T, et al. Two cases of Zika fever imported from French  
298 Polynesia to Japan, December 2013 to January 2014 [corrected]. *Euro Surveill* 2014;19.
- 299 27. Kwong JC, Druce JD, Leder K. Zika virus infection acquired during brief travel to  
300 Indonesia. *Am J Trop Med Hyg* 2013;89:516-7.

- 301 28. Leung GH, Baird RW, Druce J, Anstey NM. ZIKA VIRUS INFECTION IN AUSTRALIA  
302 FOLLOWING A MONKEY BITE IN INDONESIA. Southeast Asian J Trop Med Public Health  
303 2015;46:460-4.
- 304 29. Maria AT, Maquart M, Makinson A, et al. Zika virus infections in three travellers returning  
305 from South America and the Caribbean respectively, to Montpellier, France, December 2015 to  
306 January 2016. Euro Surveill 2016;21.
- 307 30. Shinohara K, Kutsuna S, Takasaki T, et al. Zika fever imported from Thailand to Japan,  
308 and diagnosed by PCR in the urines. J Travel Med 2016;23.
- 309 31. Simpson DI. ZIKA VIRUS INFECTION IN MAN. Trans R Soc Trop Med Hyg  
310 1964;58:335-8.
- 311 32. Summers DJ, Acosta RW, Acosta AM. Zika Virus in an American Recreational Traveler.  
312 J Travel Med 2015;22:338-40.
- 313 33. Tappe D, Nachtigall S, Kapaun A, Schnitzler P, Gunther S, Schmidt-Chanasit J. Acute  
314 Zika virus infection after travel to Malaysian Borneo, September 2014. Emerg Infect Dis  
315 2015;21:911-3.
- 316 34. Tappe D, Rissland J, Gabriel M, et al. First case of laboratory-confirmed Zika virus  
317 infection imported into Europe, November 2013. Euro Surveill 2014;19.
- 318 35. Waehre T, Maagard A, Tappe D, Cadar D, Schmidt-Chanasit J. Zika virus infection after  
319 travel to Tahiti, December 2013. Emerg Infect Dis 2014;20:1412-4.
- 320 36. Zammarchi L, Tappe D, Fortuna C, et al. Zika virus infection in a traveller returning to  
321 Europe from Brazil, March 2015. Euro Surveill 2015;20.
- 322 37. Zammarchi L, Stella G, Mantella A, et al. Zika virus infections imported to Italy: clinical,  
323 immunological and virological findings, and public health implications. J Clin Virol 2015;63:32-5.

324 38. Besnard M, Lastere S, Teissier A, Cao-Lormeau V, Musso D. Evidence of perinatal  
325 transmission of Zika virus, French Polynesia, December 2013 and February 2014. Euro Surveill  
326 2014;19.

327 39. Zika virus. World Health Organization. (Accessed 28 February 2016, at  
328 [http://www.who.int/mediacentre/factsheets/zika/en/.](http://www.who.int/mediacentre/factsheets/zika/en/))

329 40. Symptoms, Diagnosis, & Treatment. Centers for Disease Control and Prevention.  
330 (Accessed 28 February 2016, at [http://www.cdc.gov/zika/symptoms/.](http://www.cdc.gov/zika/symptoms/))

331 41. Factsheet for health professionals. European Centre for Disease Prevention and  
332 Control. (Accessed 28 February 2016, at  
333  [334](http://ecdc.europa.eu/en/healthtopics/zika_virus_infection/factsheet-health-professionals/Pages/factsheet_health_professionals.aspx.)

335

336

337

338

339

340
